# Supplementary material for: Artificial Neural Network Algorithms to Predict Resting Energy Expenditure in Critically Ill Children
Source: MDPI journal article supplement (doi:10.3390/nu13113797), 2021-10-26
Supplement: s1 [file s1]

## Supplementary Materials

### Additional File S1 (PNG format)

Additional File S1 shows the correlations between the original study variables and the REE value from Data set 2.

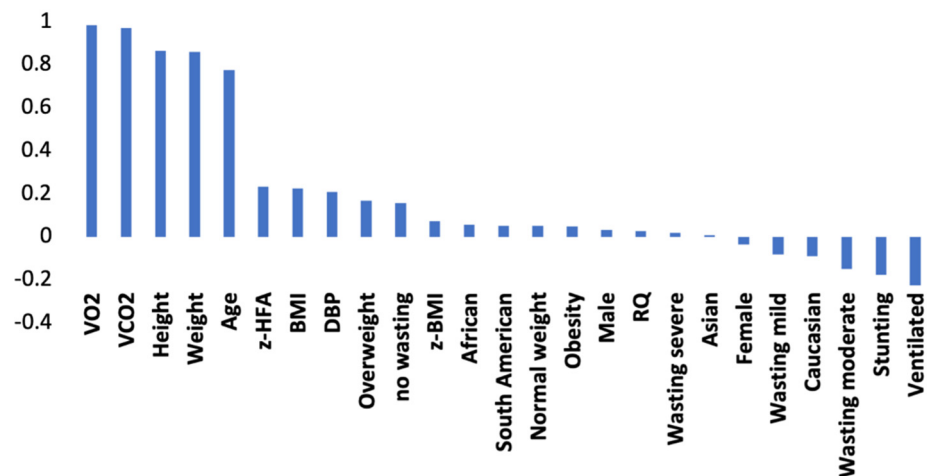

**Additional File S1.** Correlations between the original study variables and the REE value from Data set 2. Legend. Abbreviations: VO<sub>2</sub>= Oxygen Consumption; VCO<sub>2</sub>= Carbone Dioxide Production; RQ= Respiratory Quotient BMI= Body Mass Index. z-BMI= z-score BMI; z-HFA= z-score Height for Age.

### Additional File S2 (PNG format)

Additional File S2 shows the Real REE approximation with predictive equations from Data set 2

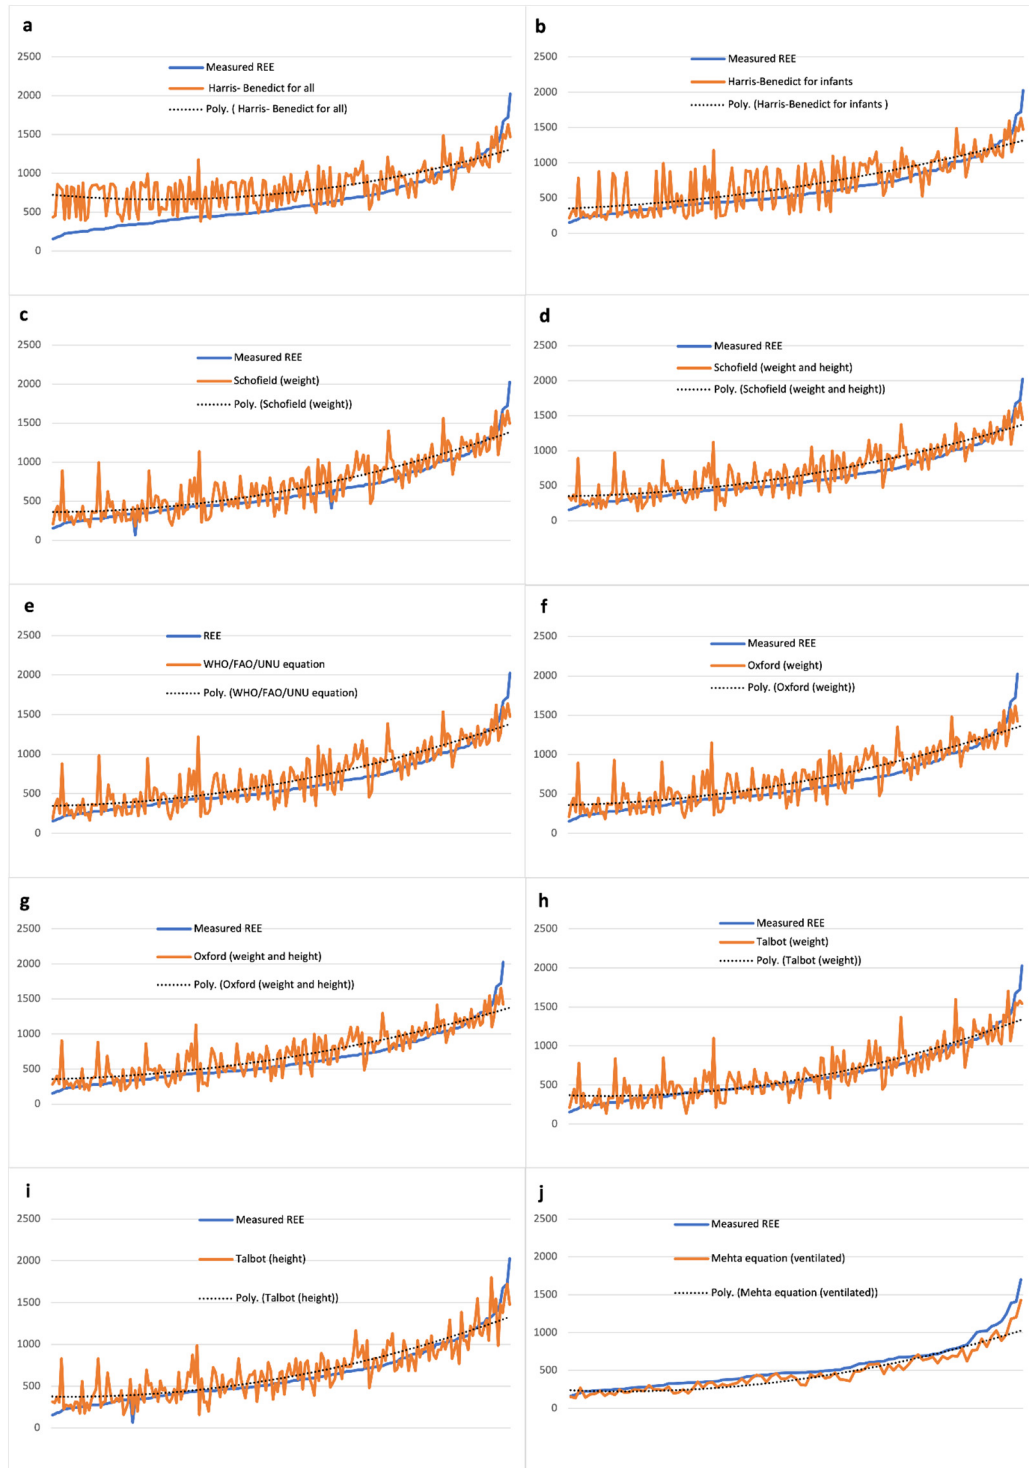

**Additional File S2.** Real REE approximation with predictive equations from Data set 2. Legend. Harris-Benedict for all (a), Harris-Benedict for infants (b), Schofield (weight) (c), Schofield (weight and height) (d), WHO/FAO/UNU equation (e), Oxford (weight) (f), Oxford (weight and height) (g), Talbot (weight) (h), Talbot (height) (i), Mehta equation in ventilated children (j).
